# Supplementary material for: Cerebral amyloid angiopathy aggravates perivascular clearance impairment in an Alzheimer’s disease mouse model
Source: PubMed Central journal article supplement (PMC7643327; doi:10.1186/s40478-020-01042-0), 2020-11-05
Supplement: 40478_2020_1042_MOESM1_ESM.pdf [file 40478_2020_1042_MOESM1_ESM.pdf]

| <b>Experiment</b>                                                                            | <b>Used mouse per group</b>                          | <b>Male and female balance</b>                                                                                           |
|----------------------------------------------------------------------------------------------|------------------------------------------------------|--------------------------------------------------------------------------------------------------------------------------|
| <b>Immunofluorescence</b><br><b>Male 8, Female 8 (n=16)</b><br><b>(50% : 50%)</b>            | Mid Wt = 4<br>Mid Tg = 4<br>Old Wt = 4<br>Old Tg = 4 | Male 2 female 2 (50% : 50%)<br>Male 2 female 2 (50% : 50%)<br>Male 2 female 2 (50% : 50%)<br>Male 2 female 2 (50% : 50%) |
| <b>Vascular pulsation</b><br><b>Male 11, Female 14 (n = 25)</b><br><b>(44% : 56%)</b>        | Mid Wt = 6<br>Mid Tg =6<br>Old Wt = 6<br>Old Tg = 7  | Male 3 female 3 (50% : 50%)<br>Male 2 female 4 (33% : 67%)<br>Male 3 female 3 (50% : 50%)<br>Male 3 female 4 (43% : 57%) |
| <b>Intraparenchymal injection</b><br><b>Male 11, Female 10 (n = 21)</b><br><b>(52% :48%)</b> | Mid Wt =5<br>Mid Tg =5<br>Old Wt =6<br>Old Tg = 5    | Male 3 female 2 (60% : 40%)<br>Male 3 female 2 (60% : 40%)<br>Male 2 female 4 (33% : 67%)<br>Male 3 female 2 (60% :40%)  |
| <b>Cisterna magna injection</b><br><b>Male 18, Female 16 (n = 34)</b><br><b>(53% : 47%)</b>  | Mid Wt =9<br>Mid Tg =9<br>Old Wt =8<br>Old Tg =8     | Male 5 female 4 (56% : 44%)<br>Male 5 female 4 (63% : 37%)<br>Male 4 female 4 (50% : 50%)<br>Male 4 female 4 (50% : 50%) |
| <b>Total n = 96</b>                                                                          |                                                      | Male 48, female 48 (50% :50%)                                                                                            |

Additional file 1. Mouse information used in each experiment
