# Supplementary material for: Cerebral amyloid angiopathy aggravates perivascular clearance impairment in an Alzheimer’s disease mouse model
Source: PubMed Central journal article supplement (PMC7643327; doi:10.1186/s40478-020-01042-0), 2020-11-05
Supplement: 40478_2020_1042_MOESM3_ESM.pdf [file 40478_2020_1042_MOESM3_ESM.pdf]

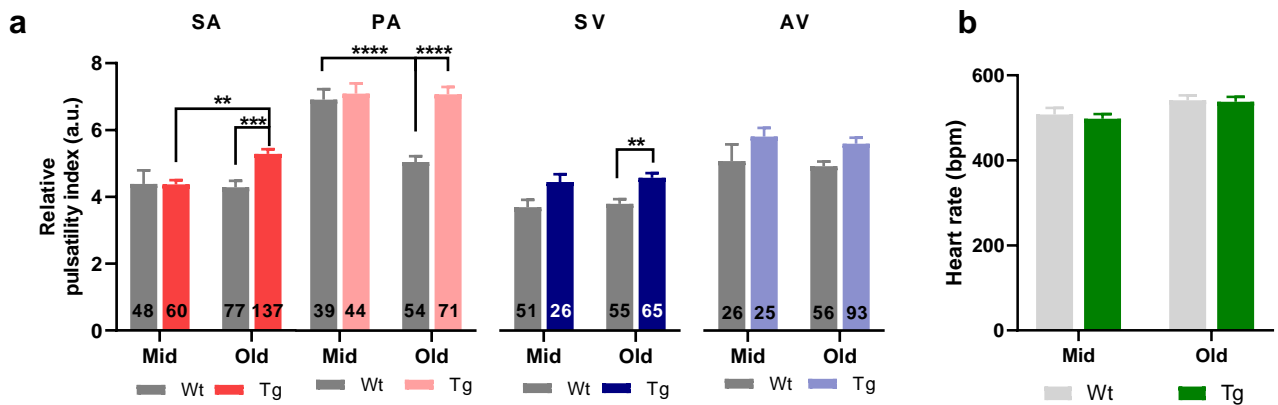

### Additional file 3. Augmented pulsation is also observed in the relative pulsatility index

**a.** Relative vascular pulsation along with the cerebrovascular tree. Note that the increased relative pulsatility index is remarkable in surface and penetrating arteries of old Tg mice. [Surface arteries (SA),  $p = 0.0192$  (genotype\*age interaction),  $p = 0.0232$  (genotype); Penetrating arteries (PA),  $p = 0.0003$  (genotype\*age interaction),  $p = 0.0002$  (age),  $p < 0.0001$  (genotype); Surface vein (SV),  $p < 0.0001$  (genotype), two-way ANOVA], (mid Wt =6, mid Tg =6, old Wt =6, old Tg =7). **b.** Comparison of heart rate. ( $p < 0.0064$  (age), two-way ANOVA), ( $n = 8$ , each group). All data are presented as the mean  $\pm$  SEM. \*\*  $p < 0.01$ , \*\*\*  $p < 0.001$ , \*\*\*\*  $p < 0.0001$ . Two-way ANOVA with Bonferroni's post hoc test.
