# Supplementary material for: Cerebral amyloid angiopathy aggravates perivascular clearance impairment in an Alzheimer’s disease mouse model
Source: PubMed Central journal article supplement (PMC7643327; doi:10.1186/s40478-020-01042-0), 2020-11-05
Supplement: 40478_2020_1042_MOESM4_ESM.pdf [file 40478_2020_1042_MOESM4_ESM.pdf]

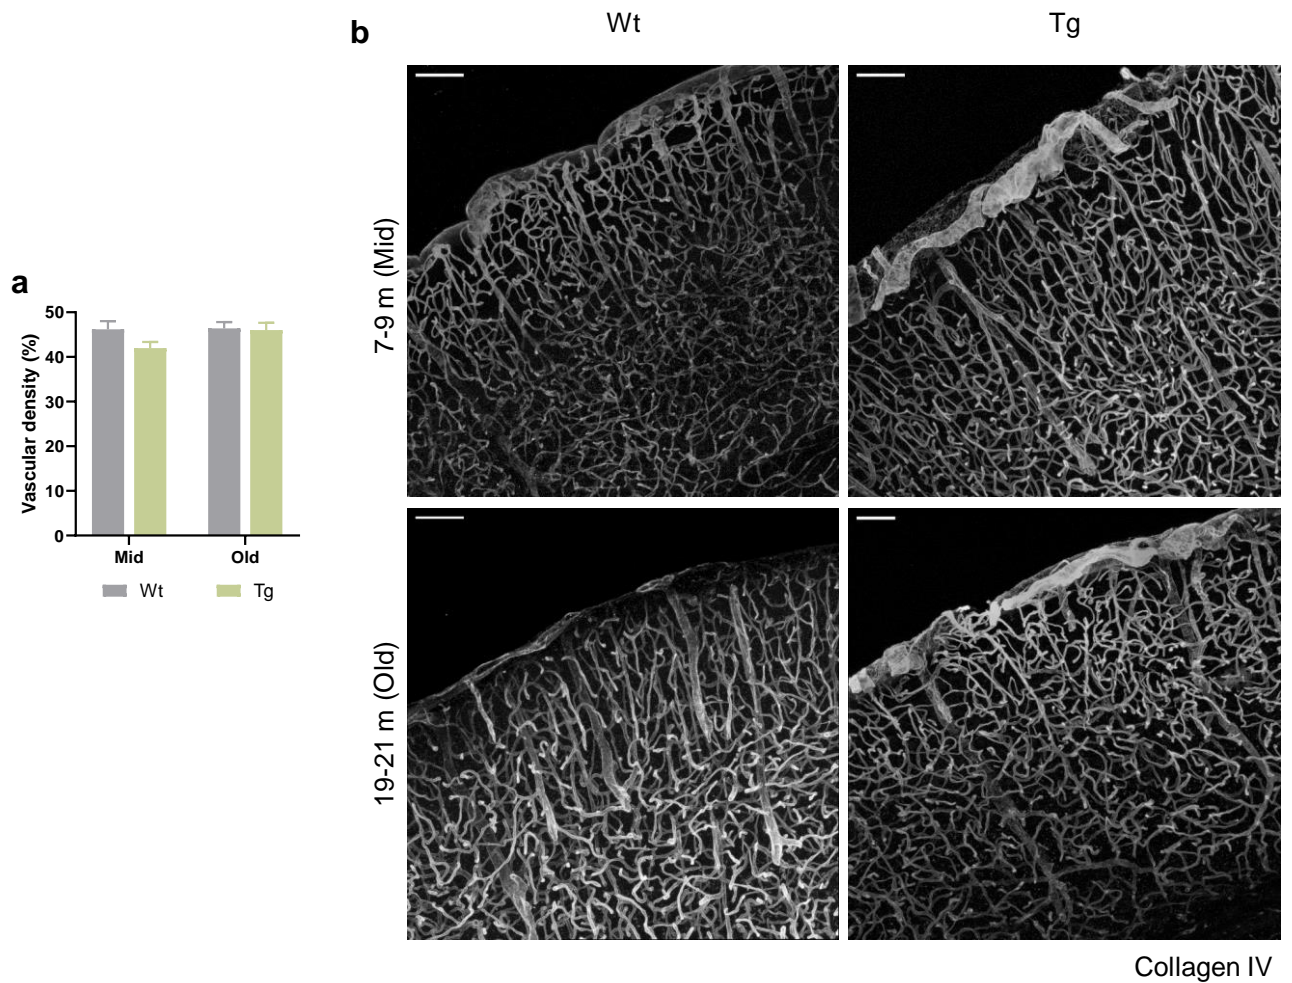

**Additional file 4. Vascular density was not changed with ageing and AD progression**

**a.** Comparison of vascular density. No significant difference was observed (interaction,  $p = 0.2455$ ; age,  $p = 0.2014$  ; genotype,  $p = 0.1666$ ) (all groups  $n = 4$ ). **b.** Representative images of cortical vascular density. Scale bar =  $100\mu\text{m}$ . All data are presented as the mean  $\pm$  SEM.
